# Supplementary material for: Predicting activatory and inhibitory drug–target interactions based on structural compound representations and genetically perturbed transcriptomes
Source: PLoS One. 2023 Apr 12;18(4):e0282042. doi: 10.1371/journal.pone.0282042 (PMC10096289; doi:10.1371/journal.pone.0282042)
Supplement: S2 Table — (XLSX) [file pone.0282042.s002.xlsx]

## Sheet: Supplementary Table S2
S2 Table. Search range and selected hyperparameter values for the cascade deep forest models.
Hyperparameter	Search range	Selected value
n_estimators	[2, 4, 8]	8
n_trees	[100, 500, 2000]	500
Max_depth	[5, 20, None]	None
Min_samples_leaf	[2, 4, 20]	2
Use_predictor	[None, “forest”, “xgboost”, “lightgbm”]	None
N_tolerant_rounds	[1,2,4]	2
